# Supplementary material for: Cost estimates of production scale semitransparent organic photovoltaic modules for building integrated photovoltaics
Source: Royal Society of Chemistry journal article supplement (doi:10.1039/d0se00910e), 2020-01-01
Supplement: d0se00910e1.pdf [file d0se00910e1.pdf]

## Supporting information

### Cost estimates of production scale semitransparent organic photovoltaic modules for building integrated photovoltaics.

Byungjun Lee<sup>1</sup>, Lucas Lahann<sup>1</sup>, Yongxi Li<sup>1</sup>, and Stephen R. Forrest<sup>1,2</sup>

<sup>1</sup>Department of Electrical Engineering and Computer Science, University of Michigan

<sup>2</sup>Departments of Physics and Materials Science and Engineering, University of Michigan, Ann Arbor, MI

#### Contents

1. Detailed materials cost estimate
2. Cost sensitivity chart
3. ST-OPV structure used for cost estimate

## 1. Materials cost estimate

| Layer                | Supplier                     | Layer thickness | Density (g/cm <sup>3</sup> ) | Usage (mg/m <sup>2</sup> ) | Cost (\$/g) | Cost (\$/m <sup>2</sup> ) | References |
|----------------------|------------------------------|-----------------|------------------------------|----------------------------|-------------|---------------------------|------------|
| ZnO                  | Sigma<br>Aldrich             | 20 nm           | 5.6                          | 7                          | 3.9         | 0.02                      | [1]        |
| MoO <sub>3</sub>     | US Research<br>Nanomaterials | 20 nm           | 4.7                          | 6                          | 4.8         | 0.03                      | [2]        |
| Ag sputter<br>target | Kurt J. Lesker               | 15 nm           | 10.5                         | 63                         | 2           | 0.13                      | [3]        |
| ITO on PET           | Li Da tech.                  | -               | -                            | -                          | -           | 5.0                       | [4]        |
| Barrier<br>substrate | Amcor                        | -               | -                            | -                          | -           | 1.5                       | [5]        |

80% utilization factor for solution processing and 25% utilization for vacuum processing was assumed.

ZnO and MoO<sub>3</sub> nanoparticles dispersed in H<sub>2</sub>O with 20 wt. % was used for cost estimation.

Order scale of 100~500g was assumed for ZnO and MoO<sub>3</sub>, as monthly usage of 1500g is expected with production rate and materials usage.

Ag sputter target with highest volume available from the vendor was used for estimation.

Barrier substrate cost was cross referenced from a recent publication as the market cost was not readily available

## 2. Sensitivity chart

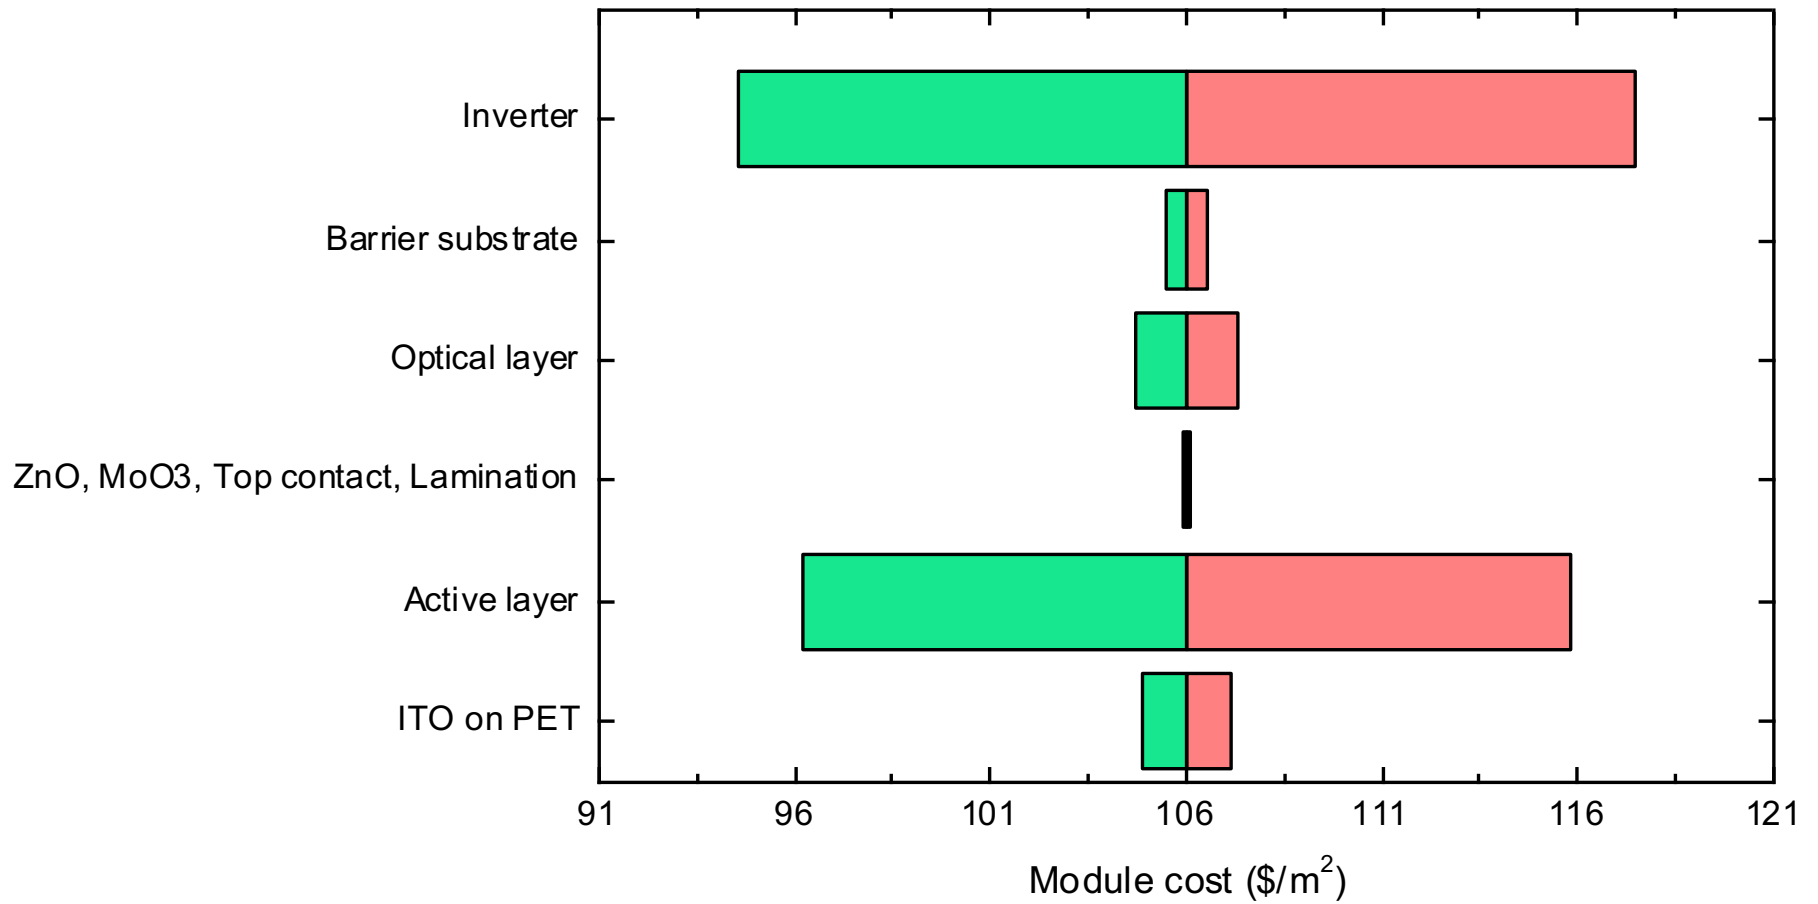

**Figure 1. Cost sensitivity for different materials**

Active layer and optical layer errors were estimated to be  $\pm 30\%$ , considering the limited data of bulk cost for active layer and orientation / installation dependence of optical layer. Errors for other items are estimated as  $\pm 20\%$ .

### 3. Proposed ST-OPV structure for the cost estimation

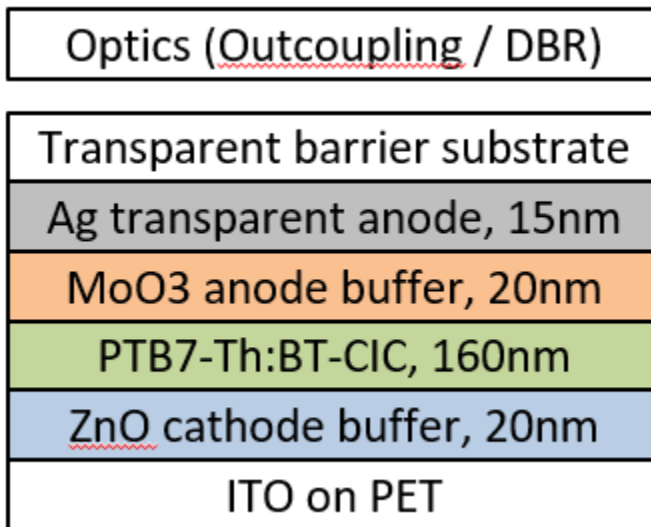

Figure 2. ST-OPV structure used for the cost estimation

## References

- [1] “Zinc oxide, dispersion nanoparticles, <100 nm particle size (TEM),  $\leq 40$  nm avg. part. size (APS), 20 wt. % in H<sub>2</sub>O | Sigma-Aldrich.” [Online]. Available:  
<https://www.sigmaaldrich.com/catalog/product/aldrich/721077?lang=en&region=US>. [Accessed: 06-Sep-2020].
- [2] “Molybdenum Oxide Nanopowder / Nanoparticles (MoO<sub>3</sub>, 99.94+%, high purity, 13-80 nm, Orthorhombic crystal).” [Online]. Available:  
<https://www.us-nano.com/inc/sdetail/246>. [Accessed: 06-Sep-2020].
- [3] “Kurt J. Lesker Company | Silver Ag Sputtering Targets | Vacuum Science Is Our Business.” [Online]. Available:  
[https://www.lesker.com/newweb/deposition\\_materials/depositionmaterials\\_sputtertargets\\_1.cfm?pgid=ag1](https://www.lesker.com/newweb/deposition_materials/depositionmaterials_sputtertargets_1.cfm?pgid=ag1). [Accessed: 06-Sep-2020].
- [4] “Conductive Ito Pet Film For Switchable Privacy Window Film - Buy High Quality Ito Pet Film,Conductive Touch Ito Film,Ito Film For Pdlc Smart Film Product on Alibaba.com.” [Online]. Available:  
[https://www.alibaba.com/product-detail/Conductive-Ito-Pet-Film-For-Switchable\\_62073674760.html?spm=a2700.details.deiletai6.9.23b5348edx6iL5](https://www.alibaba.com/product-detail/Conductive-Ito-Pet-Film-For-Switchable_62073674760.html?spm=a2700.details.deiletai6.9.23b5348edx6iL5). [Accessed: 06-Sep-2020].
- [5] J. Guo and J. Min, “A Cost Analysis of Fully Solution-Processed ITO-Free Organic Solar Modules,” *Adv. Energy Mater.*, vol. 9, no. 3, pp. 1–9, 2019.
